# Supplementary material for: Morphology-maintaining synthesis of NbN and its catalytic performance in epoxidation
Source: Royal Society of Chemistry journal article supplement (doi:10.1039/c9cy00890j), 2019-01-01
Supplement: c9cy00890j1.pdf [file c9cy00890j1.pdf]

## Supporting Information

### Morphology-maintaining synthesis of NbN and its catalytic performance in epoxidation

Tiaohao Zhao,<sup>a</sup> Shanshan Shen,<sup>a</sup> Xiaohui Liu,<sup>\*a</sup> Yong Guo,<sup>a</sup> Chih-Wen Pao,<sup>b</sup> Jeng-Lung Chen<sup>b</sup> and Yanqin Wang<sup>\*a</sup>

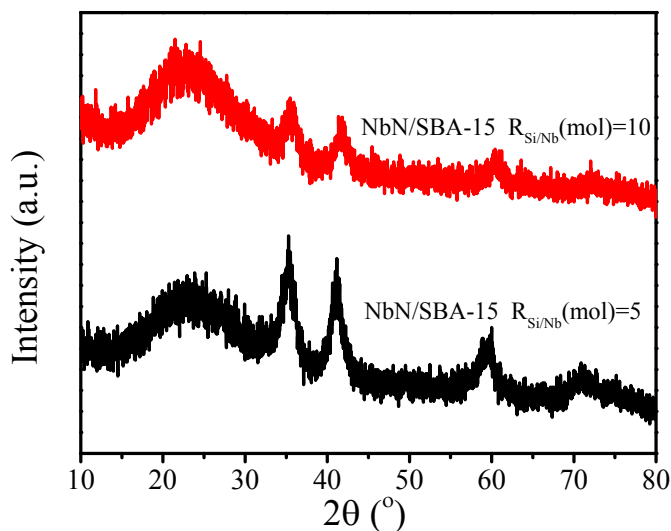

**Figure S1.** XRD patterns of the NbN/SBA-15 with different Si/Nb mol ratio. Nitridation condition: T=750 °C, R<sub>urea/Nb</sub>(mol)=16.

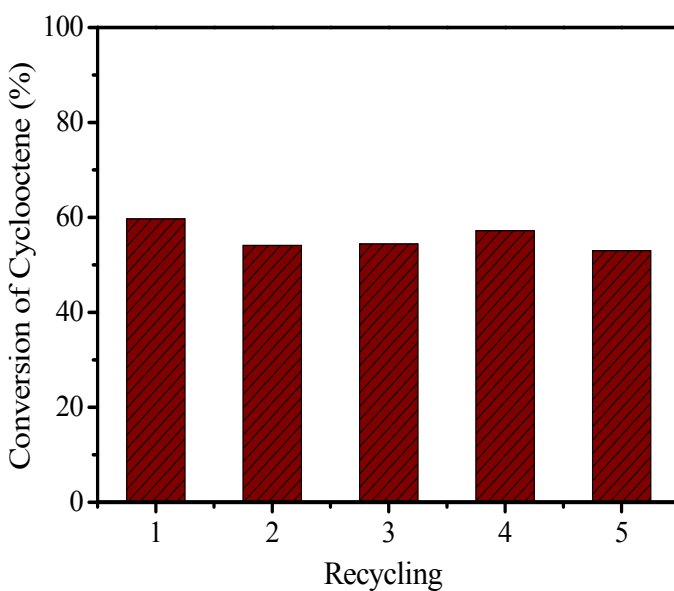

**Figure S2.** The recyclability experiments of NbN-16 in the epoxidation of cyclooctene. Reaction condition: cyclooctene (1 mmol), catalyst (0.025 g), diethylhexanol (1 mmol), CH<sub>3</sub>OH (5 mL), 60 °C, H<sub>2</sub>O<sub>2</sub> (6 mmol), 0.5 h.

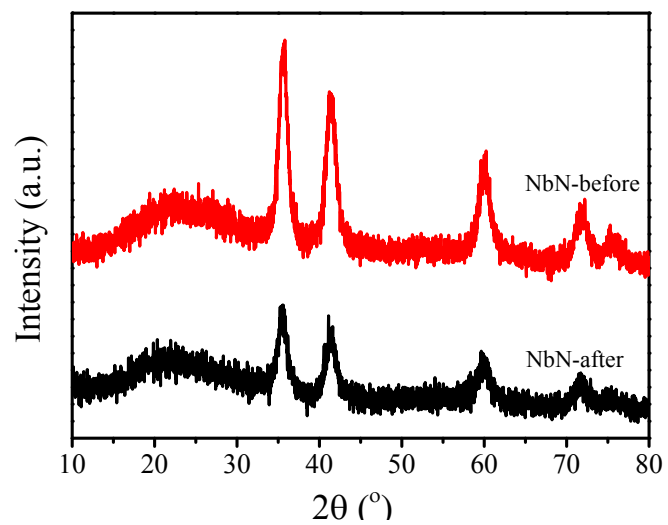

**Figure S3.** XRD patterns of the NbN-16 and the used catalyst after the recyclability experiments.

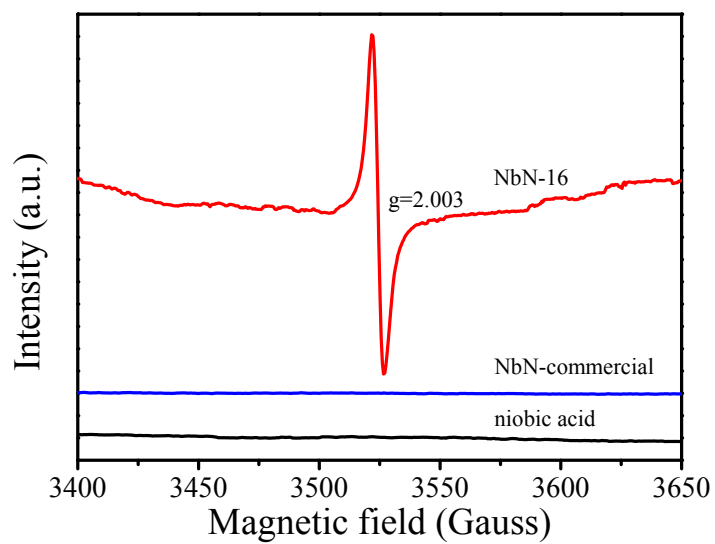

**Figure S4.** EPR spectra of niobic acid, NbN-16 and NbN-commercial.

**Table S1.** Epoxidation reaction of cyclooctene with different time

| Catalyst | Time (h) | Conversion (%) | Yield of Epoxycyclooctane (%) | Carbon Balance (%) |
|----------|----------|----------------|-------------------------------|--------------------|
| NbN-16   | 4        | 98.1           | 93.9                          | 95.8               |
| NbN-16   | 2        | 96.4           | 91.1                          | 94.7               |
| NbN-16   | 1        | 90.3           | 86.4                          | 96.1               |
| NbN-16   | 0.5      | 84.5           | 80.0                          | 95.5               |

Reaction condition: 0.025 g of catalyst, 1 mmol of cyclooctene, 6 mmol of H<sub>2</sub>O<sub>2</sub>, 1 mmol of diethylhexanol (internal standard), 5 mL of CH<sub>3</sub>OH, 60 °C.

**Table S2.** Epoxidation reaction of different epoxides over NbN and niobic acid <sup>a</sup>

|                | Substrate                                                                           | 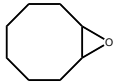 | Selectivity (%) |             | Conversion (%) |             |
|----------------|-------------------------------------------------------------------------------------|-------------------------------------------------------------------------------------|-----------------|-------------|----------------|-------------|
|                |                                                                                     |                                                                                     | NbN             | niobic acid | NbN            | niobic acid |
| 1              |  |  | 99              | 99          | 96.4           | 46.8        |
| 2              |  |  | 97.5            | 63.6        | 77.8           | 54.6        |
| 3              |  |  | 83.3            | 84.6        | 43.7           | 13.5        |
| 4              |  |  | 99              | 99          | 22.3           | 5.2         |
| 5              |  |  | 99              | 99          | 18.6           | 4.3         |
| 6 <sup>b</sup> |  |  | 71.4            | 43.4        | 75.1           | 42.1        |

Reaction condition: 0.025 g of catalysts, 1 mmol of substrate, 6 mmol of H<sub>2</sub>O<sub>2</sub>, 5 mL of CH<sub>3</sub>OH, 60 °C, a: t=2 h. b: t=12 h.

**Table S3.** Epoxidation reaction of cyclooctene over Nb-SBA-15 catalysts <sup>a</sup>

| Solvent            | Catalysts                  | H <sub>2</sub> O <sub>2</sub><br>(mmol) | Time<br>(h) | Conversion<br>(%) |
|--------------------|----------------------------|-----------------------------------------|-------------|-------------------|
| CH <sub>3</sub> OH | Nb-O-SBA-15-5 <sup>b</sup> | 1                                       | 0.5         | 5.4               |
| CH <sub>3</sub> OH | Nb-N-SBA-15-5 <sup>c</sup> | 1                                       | 0.5         | 30.7              |

Notes: <sup>a</sup> Reaction conditions: 0.025 g of catalyst, 1 mmol of cyclooctene, 1 mmol of H<sub>2</sub>O<sub>2</sub>, 1 mmol of diethyl hexanol (internal standard), 5 mL of CH<sub>3</sub>OH, 60 °C, 0.5 h. <sup>b</sup> The Si/Nb mol ratio of Nb-O-SBA-15-5 is 5. <sup>c</sup> Nitridation condition: T=750 °C, R<sub>urea/Nb</sub>(mol)=16.
